# Supplementary material
Source: HighWire-hosted journal article supplement (https://www.ajnr.org/highwire/filestream/52231/field_highwire_adjunct_files/0/2710_table.pdf)
Supplement: 2710_table.pdf [file 2710_table.pdf]

**On-line Table: Clinical and imaging data<sup>a</sup>**

| No. | Pretreatment        |                        |               |                              |                         |                   | Posttreatment                                         |                   |                     |                  |                |
|-----|---------------------|------------------------|---------------|------------------------------|-------------------------|-------------------|-------------------------------------------------------|-------------------|---------------------|------------------|----------------|
|     | Aneurysm Location   | Pre-FD Clinical Data   | Diameter (mm) | Interface (mm <sup>2</sup> ) | Pre-Existing Thrombosis | Aneurysm Embedded | Post-FD Clinical Data                                 | FLAIR Hypersignal | Post-Gd Enhancement | Post-FD Diameter | Steroid Timing |
| 1   | Carotid-ophthalmic  | Asymptomatic           | 12 × 10       | 356                          | No                      | Yes               | Headache, V neuralgia, diplopia days 8–20             | No                | No                  | 12 × 10          | No             |
| 2   | Cavernous carotid   | Cavernous compression  | 26 × 24       | 1910                         | Yes                     | Yes               | Intense headache, III, V, VI paralysis                | Yes               | Yes                 | 26 × 18          | Pre-stent      |
| 3   | Vertebrobasilar     | Brain stem mass effect | 28 × 27       | 2346                         | Yes                     | Yes               | Intense posterior headache, hemianesthesia, dysphagia | Yes               | Yes                 | 27 × 26          | Pre-stent      |
| 4   | Carotid-ophthalmic  | Chiasma mass effect    | 14 × 13       | 558                          | No                      | Yes               | Headache, hemianopsia                                 | Yes               | Yes                 | 14 × 10          | Delayed        |
| 5   | Vertebrobasilar     | Asymptomatic           | 10 × 7        | 199                          | Yes                     | Yes               | Headache during 2 months                              | No                | No                  | 8 × 6            | No             |
| 6   | Vertebrobasilar     | Brain stem mass effect | 20 × 14       | 797                          | No                      | Yes               | Intense headache days 3–15, stiff neck                | Yes               | Yes                 | 16 × 14          | Delayed        |
| 7   | Cavernous carotid   | Cavernous compression  | 22 × 17       | 1089                         | Yes                     | Yes               | Persistent headache 3 months                          | Yes               | Yes                 | 20 × 17          | Pre-stent      |
| 8   | Carotid-ophthalmic  | Chiasma mass effect    | 15 × 10       | 422                          | No                      | No                |                                                       | NA                | NA                  | 20 × 15          | No             |
| 9   | Carotid-ophthalmic  | Asymptomatic           | 7 × 5         | 100                          | No                      | No                |                                                       | NA                | NA                  | 2 × 1            | No             |
| 10  | Ant cerebral artery | Asymptomatic           | 16 × 8        | 343                          | No                      | Yes               |                                                       | NA                | NA                  | 30 × 16          | No             |
| 11  | Sylvian artery      | Asymptomatic           | 21 × 12       | 690                          | Yes                     | Yes               |                                                       | No                | No                  | 21 × 12          | No             |
| 12  | Carotid-ophthalmic  | Asymptomatic           | 14 × 12       | 503                          | No                      | No                |                                                       | No                | No                  | 15 × 13          | Pre-stent      |
| 13  | Vertebrobasilar     | Asymptomatic           | 6 × 4         | 67                           | Yes                     | Yes               |                                                       | No                | No                  | 6 × 4            | No             |
| 14  | Vertebrobasilar     | Asymptomatic           | 7 × 5         | 100                          | No                      | No                |                                                       | NA                | NA                  | 7 × 5            | No             |
| 15  | Cavernous carotid   | Asymptomatic           | 9 × 8         | 217                          | No                      | No                |                                                       | No                | No                  | 19 × 14          | No             |
| 16  | Sylvian artery      | Right hemiparesis      | 18 × 15       | 802                          | No                      | Yes               |                                                       | No                | No                  | 18 × 15          | No             |
| 17  | Carotid-ophthalmic  | Asymptomatic           | 15 × 13       | 585                          | No                      | Yes               |                                                       | No                | Yes                 | 14 × 10          | No             |

**Note:**—FD indicates flow diverter; NA, not available; Gd, gadolinium; ant, anterior; III, third oculomotor nerve; V, trigeminal nerve; VI, sixth oculomotor nerve.  
<sup>a</sup> This table displays data of the 7 postoperative worsened patients first and then the 10 unchanged patients.
